# Supplementary figures and images for: Zinc Supplementation Enhances the Pro-Death Function of UPR in Lymphoma Cells Exposed to Radiation
Source: MDPI journal article supplement (doi:10.3390/biology11010132), 2022-01-13

Figure S1

A

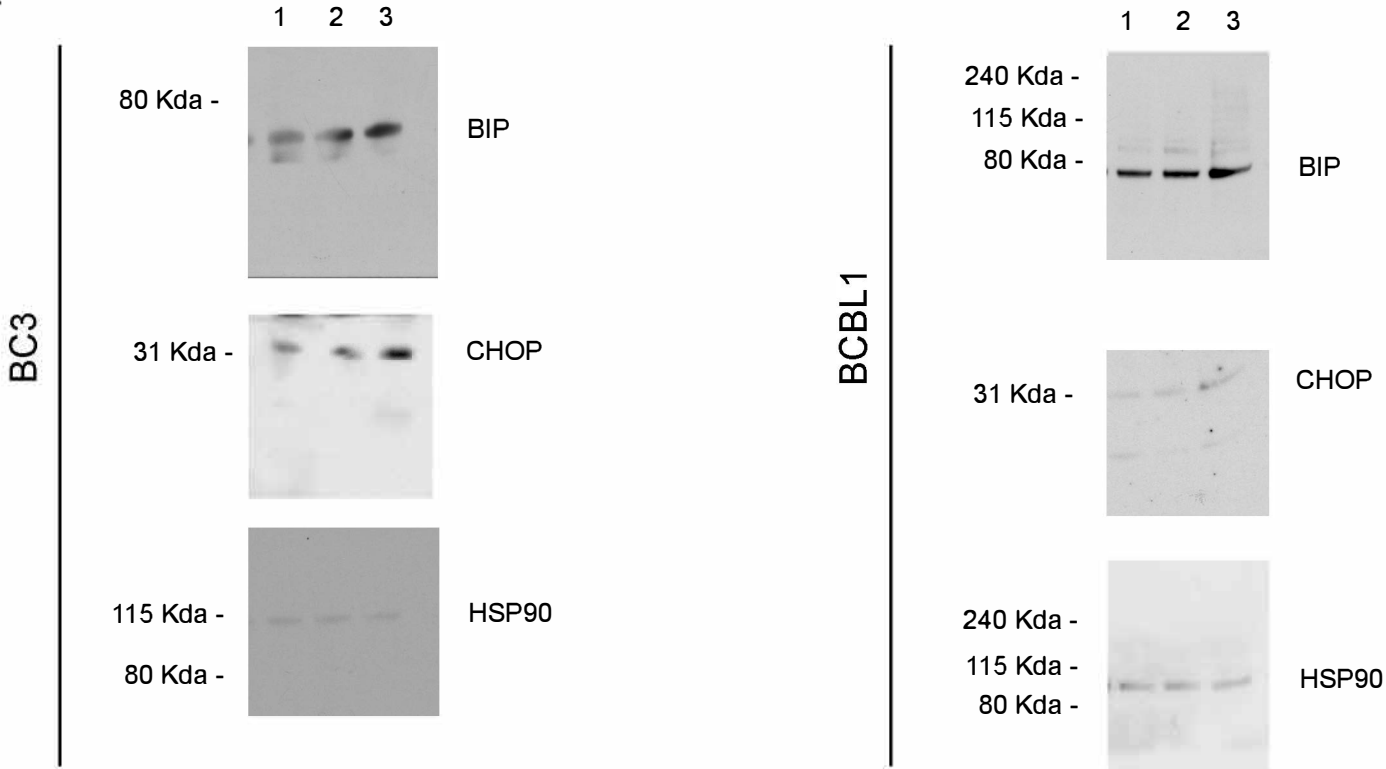

B

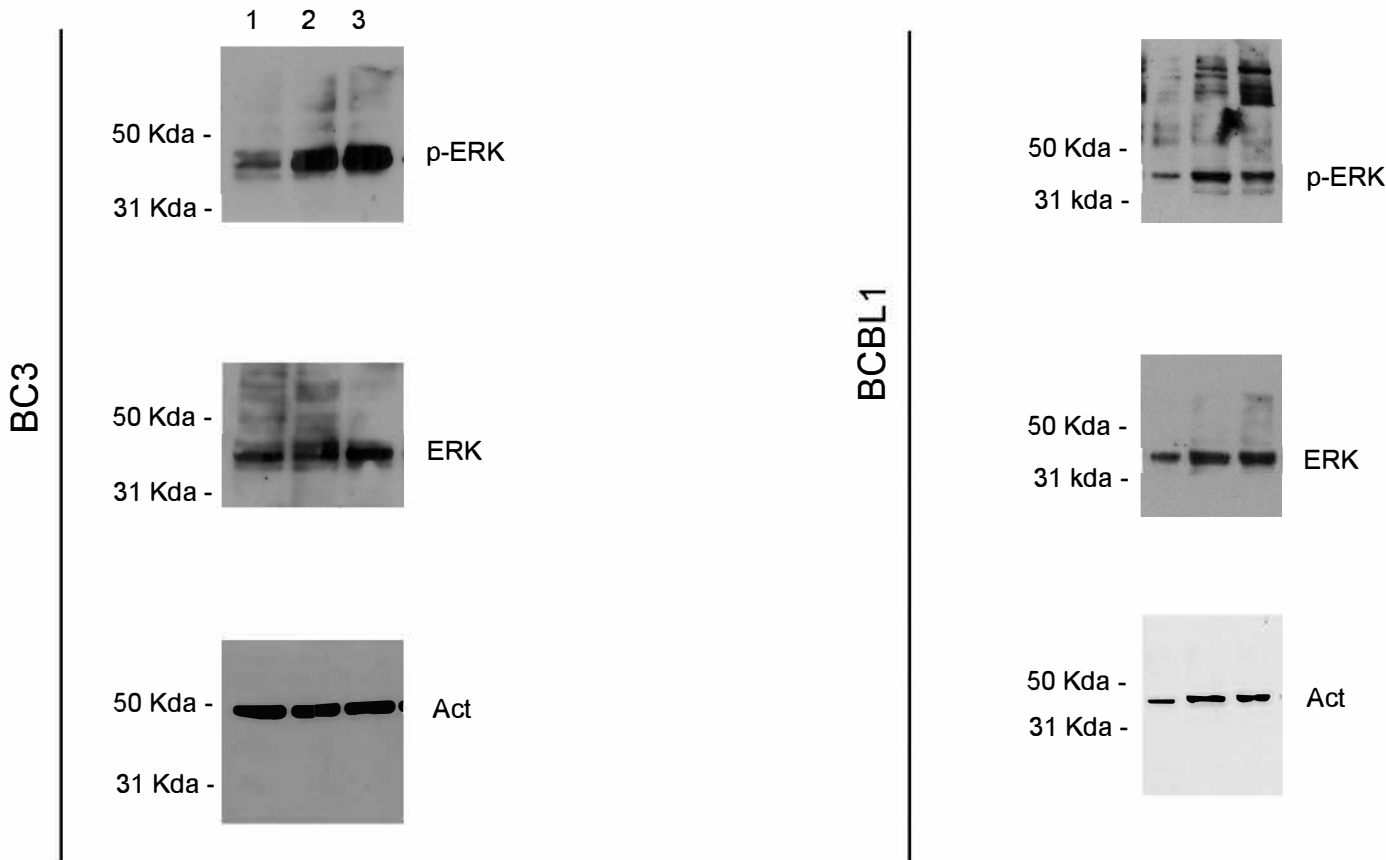

Figure S2

B

BC3

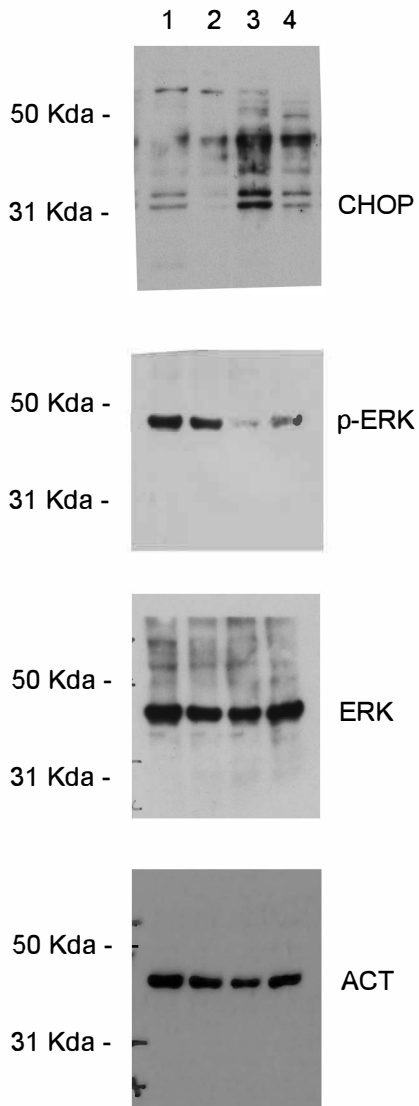

C

BCBL1

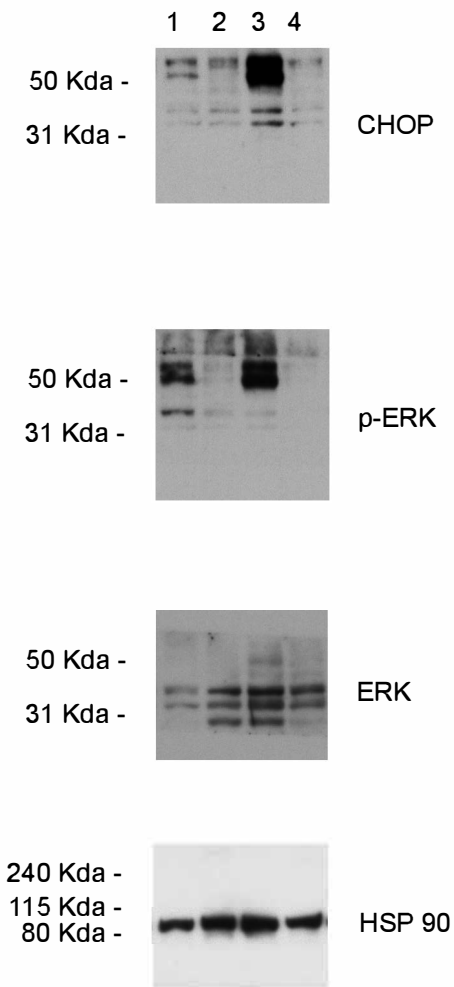

Figure S3

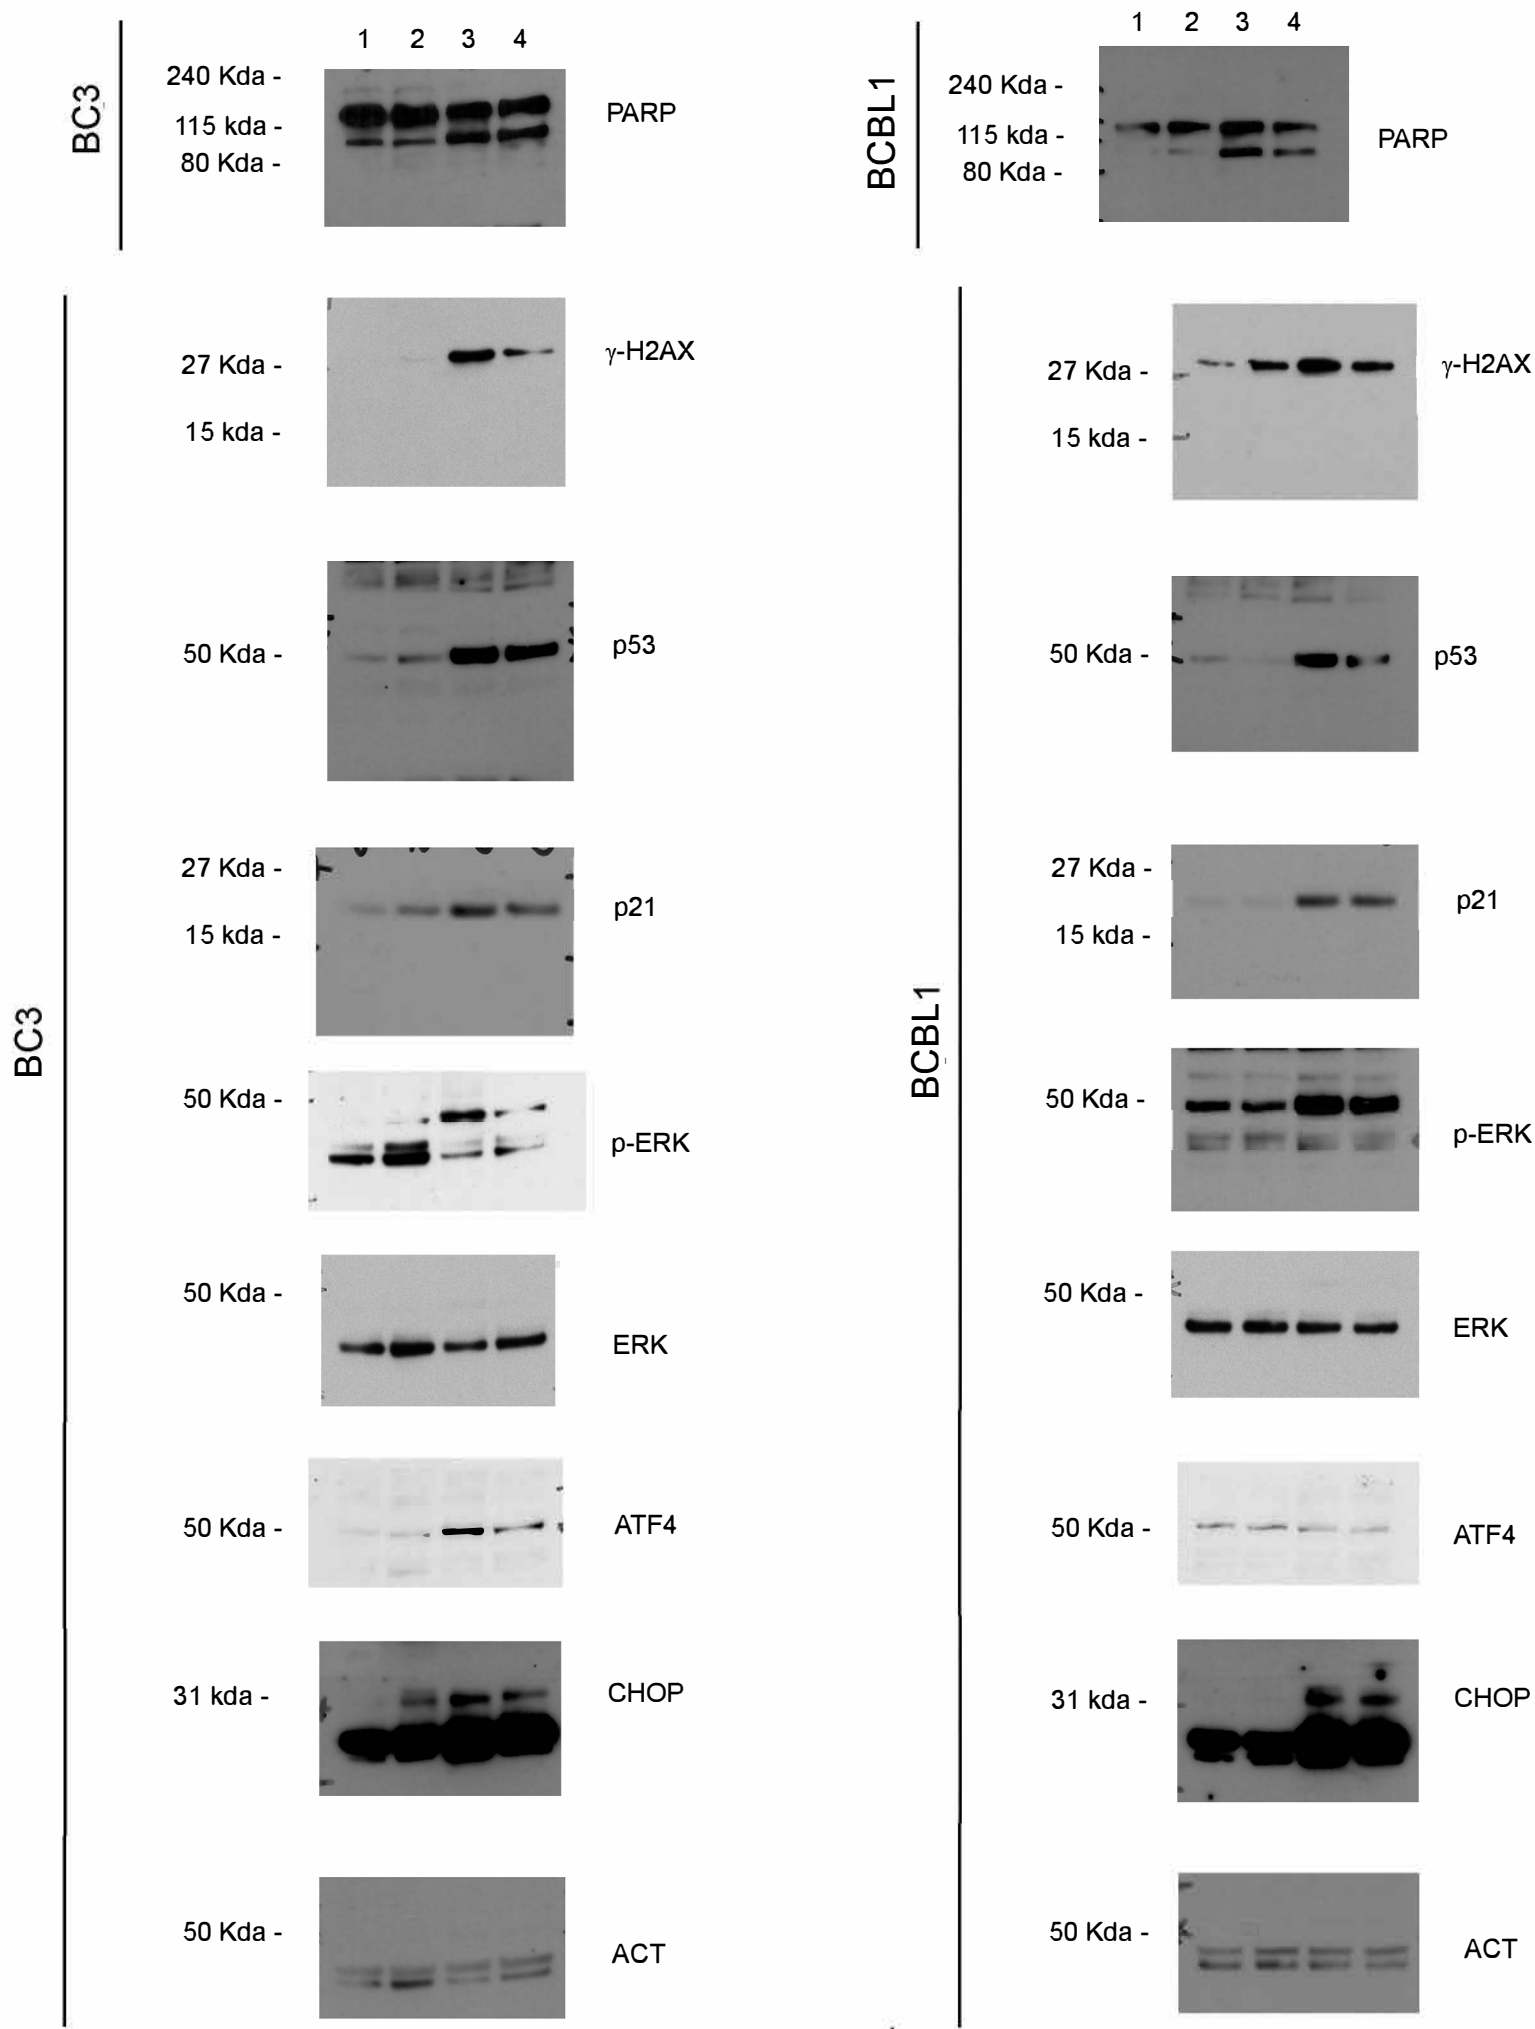

Figure S4

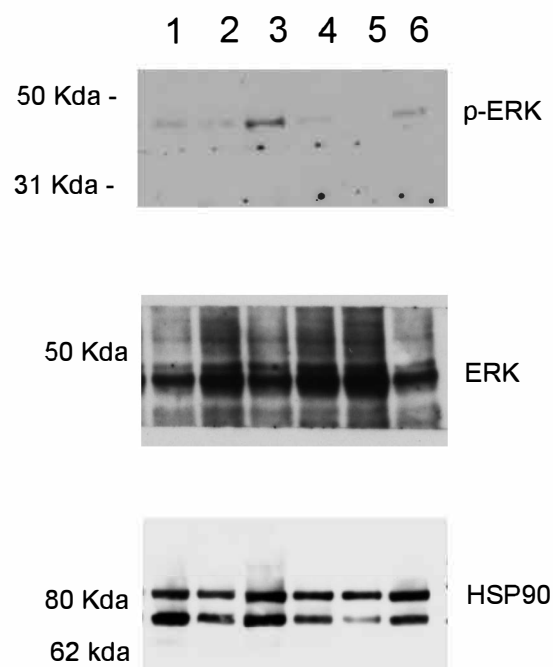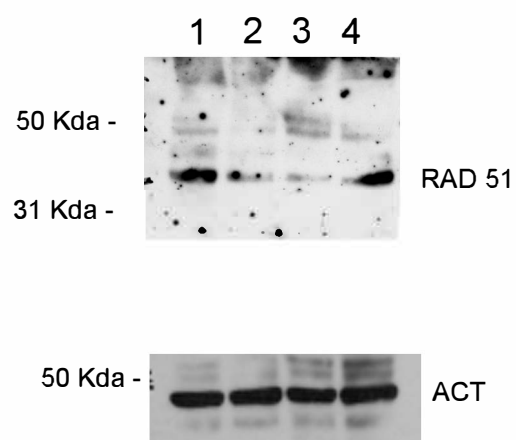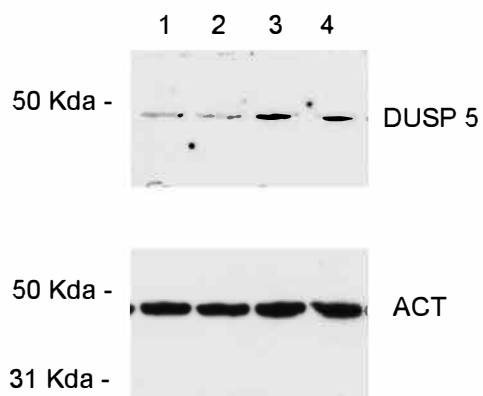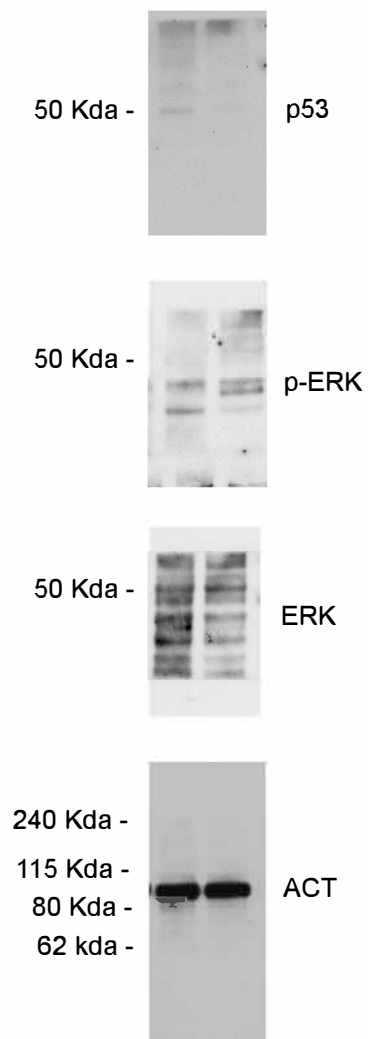

Supplement: s1 [file s1]
